# Supplementary material for: ART FounDATion-LOG (ARabidopsis Transcription regulatory Factor Domain-domain interaction Analysis Tool-Liquid liquid phase separation, Oligomerization, Go analysis), a toolkit for interaction data based domain analysis
Source: Preprints.org preprint supplement (doi:10.20944/preprints202306.0366.v1), 2023-06-06
Supplement: Supplementary file 1 [file TableS2.xls]

## Sheet: Sheet1
Table S1. Prediction class distribution table
actual	predicted	error distribution
		homo_obligate_	C1_obligate_hetero_	homo_hetero_moderate_	hetero_obligate_monomer_
		oligomer_obligate	single_oligomer_obligate	oligomer_obligate	oligomer_moderate
1:homo_obligate_oligomer_obligate	2:C1_obligate_hetero_single_oligomer_obligate	0.19	*0.619	0.048	0.143
1:homo_obligate_oligomer_obligate	2:C1_obligate_hetero_single_oligomer_obligate	0.19	*0.619	0.048	0.143
2:C1_obligate_hetero_single_oligomer_obligate	2:C1_obligate_hetero_single_oligomer_obligate	0.19	*0.619	0.048	0.143
1:homo_obligate_oligomer_obligate	1:homo_obligate_oligomer_obligate	*1	0	0	0
2:C1_obligate_hetero_single_oligomer_obligate	2:C1_obligate_hetero_single_oligomer_obligate	0	*1	0	0
2:C1_obligate_hetero_single_oligomer_obligate	1:homo_obligate_oligomer_obligate	*0.6	0.4	0	0
1:homo_obligate_oligomer_obligate	1:homo_obligate_oligomer_obligate	*1	0	0	0
2:C1_obligate_hetero_single_oligomer_obligate	2:C1_obligate_hetero_single_oligomer_obligate	0	*0.667	0.333	0
2:C1_obligate_hetero_single_oligomer_obligate	2:C1_obligate_hetero_single_oligomer_obligate	0.375	*0.625	0	0
1:homo_obligate_oligomer_obligate	2:C1_obligate_hetero_single_oligomer_obligate	0.273	*0.636	0.091	0
2:C1_obligate_hetero_single_oligomer_obligate	2:C1_obligate_hetero_single_oligomer_obligate	0.273	*0.636	0.091	0
2:C1_obligate_hetero_single_oligomer_obligate	2:C1_obligate_hetero_single_oligomer_obligate	0	*1	0	0
1:homo_obligate_oligomer_obligate	2:C1_obligate_hetero_single_oligomer_obligate	0.273	*0.636	0.091	0
2:C1_obligate_hetero_single_oligomer_obligate	2:C1_obligate_hetero_single_oligomer_obligate	0	*1	0	0
2:C1_obligate_hetero_single_oligomer_obligate	2:C1_obligate_hetero_single_oligomer_obligate	0.273	*0.636	0.091	0
1:homo_obligate_oligomer_obligate	2:C1_obligate_hetero_single_oligomer_obligate	0.25	*0.667	0.083	0
2:C1_obligate_hetero_single_oligomer_obligate	2:C1_obligate_hetero_single_oligomer_obligate	0	*1	0	0
4:hetero_obligate_monomer_oligomer_moderate	4:hetero_obligate_monomer_oligomer_moderate	0	0.333	0	*0.667
1:homo_obligate_oligomer_obligate	1:homo_obligate_oligomer_obligate	*1	0	0	0
2:C1_obligate_hetero_single_oligomer_obligate	2:C1_obligate_hetero_single_oligomer_obligate	0	*0.714	0	0.286
4:hetero_obligate_monomer_oligomer_moderate	2:C1_obligate_hetero_single_oligomer_obligate	0	*0.714	0	0.286
1:homo_obligate_oligomer_obligate	1:homo_obligate_oligomer_obligate	*0.75	0.125	0.125	0
2:C1_obligate_hetero_single_oligomer_obligate	2:C1_obligate_hetero_single_oligomer_obligate	0	*1	0	0
4:hetero_obligate_monomer_oligomer_moderate	1:homo_obligate_oligomer_obligate	*0.75	0.125	0.125	0
1:homo_obligate_oligomer_obligate	2:C1_obligate_hetero_single_oligomer_obligate	0.3	*0.7	0	0
2:C1_obligate_hetero_single_oligomer_obligate	2:C1_obligate_hetero_single_oligomer_obligate	0.3	*0.7	0	0
3:homo_hetero_moderate_oligomer_obligate	2:C1_obligate_hetero_single_oligomer_obligate	0.3	*0.7	0	0
1:homo_obligate_oligomer_obligate	1:homo_obligate_oligomer_obligate	*1	0	0	0
2:C1_obligate_hetero_single_oligomer_obligate	2:C1_obligate_hetero_single_oligomer_obligate	0.333	*0.583	0.083	0
